# Supplementary material for: Changes in Endogenous Phytohormones of Gerbera jamesonii Axillary Shoots Multiplied under Different Light Emitting Diodes Light Quality
Source: MDPI journal article supplement (doi:10.3390/molecules27061804), 2022-03-10
Supplement: s1 [file s1]

# Supplementary Material for:

## Changes in endogenous phytohormones of *Gerbera jamesonii* axillary shoots multiplied under different Light Emitting Diodes light quality

Monika Cioć <sup>1,\*</sup>, Michał Dziurka <sup>2</sup> and Bożena Pawłowska <sup>1</sup>

<sup>1</sup> Department of Ornamental Plants and Garden Art, Faculty of Biotechnology and Horticulture, University of Agriculture in Kraków, 29 Listopada 54, 31-425 Kraków, Poland; monika.cioc@urk.edu.pl

<sup>2</sup> Department of Developmental Biology, The Franciszek Górski Institute of Plant Physiology, Polish Academy of Sciences, Niezapominajek 21, 30-239 Kraków, Poland; m.dziurka@ifr-pan.edu.pl

\* Correspondence: monika.cioc@urk.edu.pl

**Table S1.** Mean content (pmol/g) of determined endogenous hormones and related compounds (PhRC) in starting material and in the stages of culture (after 10, 20, 30 and 40 days) in relation to treatment with light of different qualities.

| Days              | Light quality  | CYTOKININS |        |         |       |          |       |         |       |         |         |        |         |        |
|-------------------|----------------|------------|--------|---------|-------|----------|-------|---------|-------|---------|---------|--------|---------|--------|
|                   |                | IPD        | IP     | t-ZR    | DH-ZR | DH-Z     | t-Z   | t-Z7G   | t-ZOG | c-ZR    | c-Z     | KR     | K       | Σ      |
| Starting material |                | 13.08      | 49.86  | 12.85   | 3.75  | 209.87   | 22.75 | 3.24    | 4.36  | 25.58   | 1.40    | 107.88 | 386.17  | 840.79 |
| 10                | B <sup>1</sup> | 3.06       | 44.81  | 13.36   | 4.39  | 234.79   | 24.08 | 2.93    | 4.16  | 17.93   | 0.66    | 59.69  | 45.98   | 455.83 |
|                   | RB             | 8.66       | 37.26  | 12.30   | 3.24  | 225.75   | 24.24 | 2.63    | 4.45  | 16.11   | 0.78    | 55.15  | 30.84   | 421.39 |
|                   | R              | 6.96       | 50.00  | 13.73   | 5.44  | 260.72   | 22.08 | 3.2     | 4.60  | 12.39   | 0.52    | 61.10  | 43.11   | 483.86 |
|                   | Fl             | 7.80       | 37.24  | 12.28   | 3.35  | 219.38   | 20.03 | 1.81    | 3.71  | 18.17   | 0.55    | 45.84  | 26.47   | 396.61 |
| 20                | B              | 3.26       | 43.61  | 13.66   | 3.49  | 231.26   | 24.73 | 2.75    | 3.13  | 12.78   | 0.96    | 44.38  | 27.07   | 411.07 |
|                   | RB             | 5.95       | 42.58  | 13.06   | 3.98  | 234.38   | 23.03 | 2.66    | 4.01  | 15.48   | 0.69    | 53.23  | 34.69   | 433.75 |
|                   | R              | 4.29       | 53.69  | 12.91   | 4.51  | 256.86   | 28.37 | 3.10    | 4.81  | 15.63   | 0.66    | 50.27  | 14.08   | 449.17 |
|                   | Fl             | 4.57       | 27.75  | 9.93    | 4.15  | 232.72   | 22.42 | 2.37    | 3.49  | 18.59   | 0.54    | 44.92  | 11.49   | 382.94 |
| 30                | B              | 7.70       | 44.33  | 13.30   | 4.04  | 219.74   | 22.57 | 2.67    | 3.80  | 9.99    | 1.30    | 43.28  | 38.57   | 411.29 |
|                   | RB             | 10.48      | 59.95  | 14.29   | 4.26  | 259.84   | 27.85 | 2.99    | 4.59  | 13.57   | 1.01    | 46.61  | 49.26   | 494.70 |
|                   | R              | 12.70      | 58.58  | 11.84   | 4.35  | 238.55   | 25.26 | 2.89    | 4.53  | 14.21   | 0.75    | 46.02  | 24.70   | 444.38 |
|                   | Fl             | 17.22      | 45.77  | 12.74   | 3.32  | 214.60   | 24.90 | 3.23    | 4.48  | 14.84   | 1.30    | 43.30  | 35.10   | 420.80 |
| 40                | B              | 8.71       | 63.14  | 13.07   | 5.77  | 245.26   | 26.68 | 2.92    | 3.75  | 8.01    | 1.23    | 45.06  | 30.57   | 454.18 |
|                   | RB             | 8.85       | 58.73  | 13.01   | 2.48  | 226.76   | 24.48 | 3.12    | 4.25  | 8.69    | 0.82    | 43.72  | 28.69   | 423.61 |
|                   | R              | 21.29      | 62.30  | 11.13   | 6.04  | 219.84   | 21.52 | 4.97    | 3.84  | 7.36    | 0.47    | 39.19  | 23.20   | 421.16 |
|                   | Fl             | 8.22       | 60.00  | 15.03   | 4.71  | 241.28   | 20.82 | 2.85    | 5.61  | 10.10   | 1.18    | 45.32  | 28.38   | 443.49 |
| Mean:             |                | 12.18      | 45.44  | 12.48   | 4.26  | 237.66   | 24.20 | 3.39    | 4.37  | 12.98   | 0.89    | 50.15  | 30.38   | 438.82 |
| AUKSINS           |                |            |        |         |       |          |       |         |       |         |         |        |         |        |
|                   |                | IAA-Carb   | IBA    | IAA     |       | IAA-Glut |       | IAA-ASA |       | oxo-IAA | IAA-Met |        | Σ       |        |
| Starting material |                | 2761.83    | 784.78 | 1603.11 |       | 489.35   |       | 1602.69 |       | 474.76  | 405.94  |        | 8122.45 |        |
| 10                | B              | 1679.04    | 315.64 | 1100.37 |       | 1304.08  |       | 611.61  |       | 1211.73 | 202.04  |        | 6424.51 |        |
|                   | RB             | 1384.39    | 296.56 | 952.46  |       | 1215.72  |       | 452.18  |       | 872.39  | 162.86  |        | 5336.55 |        |
|                   | R              | 1199.72    | 217.54 | 1479.46 |       | 920.31   |       | 488.24  |       | 989.22  | 221.83  |        | 5516.33 |        |
|                   | Fl             | 1638.82    | 245.64 | 928.05  |       | 1110.24  |       | 403.60  |       | 1107.57 | 186.37  |        | 5620.28 |        |

|       |    |         |        |         |         |         |         |        |          |
|-------|----|---------|--------|---------|---------|---------|---------|--------|----------|
| 20    | B  | 3232.47 | 310.13 | 1476.28 | 1977.78 | 793.21  | 1049.45 | 243.23 | 9082.54  |
|       | RB | 1826.89 | 277.10 | 1187.32 | 1305.63 | 549.77  | 1046.07 | 203.27 | 6396.04  |
|       | R  | 2191.37 | 286.27 | 1462.44 | 2145.53 | 537.12  | 844.99  | 274.20 | 7741.92  |
|       | Fl | 1429.73 | 249.09 | 1141.74 | 1624.36 | 540.32  | 890.22  | 230.42 | 6105.88  |
| 30    | B  | 2669.82 | 290.93 | 1515.15 | 1303.28 | 1835.32 | 918.82  | 298.40 | 8831.72  |
|       | RB | 3457.48 | 337.94 | 1638.63 | 2372.35 | 234.55  | 623.16  | 401.31 | 11145.41 |
|       | R  | 2241.33 | 444.69 | 1372.19 | 1034.28 | 730.44  | 612.06  | 335.12 | 6770.11  |
|       | Fl | 3801.09 | 308.39 | 1335.70 | 87.63   | 1148.42 | 679.45  | 330.92 | 7691.61  |
| 40    | B  | 2987.57 | 223.27 | 1551.01 | 2296.52 | 704.31  | 954.11  | 374.11 | 9090.88  |
|       | RB | 1950.54 | 209.27 | 1179.67 | 967.90  | 626.37  | 424.72  | 338.67 | 5697.15  |
|       | R  | 2502.13 | 319.81 | 1073.86 | 138.60  | 641.61  | 387.84  | 368.30 | 5432.14  |
|       | Fl | 3179.52 | 238.87 | 1738.93 | 996.75  | 760.65  | 808.95  | 454.42 | 8178.08  |
| Mean: |    | 2500.41 | 326.98 | 1333.49 | 1229.99 | 1359.07 | 799.78  | 308.64 | 8240.94  |

#### GIBBERELLINS

|                   |    | GA <sub>1</sub> | GA <sub>3</sub> | GA <sub>4</sub> | GA <sub>5</sub> | GA <sub>6</sub> | GA <sub>7</sub> | GA <sub>8</sub> | GA <sub>9</sub> | GA <sub>20</sub> | Σ        |
|-------------------|----|-----------------|-----------------|-----------------|-----------------|-----------------|-----------------|-----------------|-----------------|------------------|----------|
| Starting material |    | 303.60          | 981.61          | 104.69          | 35.37           | 1571.99         | 17.97           | 297.23          | 66.52           | 42.52            | 3421.49  |
| 10                | B  | 378.79          | 935.80          | 65.86           | 104.96          | 5664.88         | 7.04            | 721.08          | 59.15           | 79.32            | 8016.88  |
|                   | RB | 259.79          | 1388.30         | 99.55           | 89.19           | 6628.64         | 9.78            | 596.86          | 56.53           | 91.18            | 9219.83  |
|                   | R  | 429.36          | 737.36          | 117.50          | 140.98          | 7281.39         | 10.02           | 661.42          | 81.32           | 193.65           | 9653.01  |
|                   | Fl | 319.63          | 995.04          | 94.83           | 118.20          | 5165.71         | 6.75            | 557.43          | 56.74           | 109.82           | 7424.15  |
| 20                | B  | 270.48          | 1771.42         | 95.22           | 66.98           | 72.51.86        | 6.32            | 517.33          | 81.30           | 44.16            | 10105.09 |
|                   | RB | 331.61          | 1165.58         | 94.60           | 104.06          | 63.98.50        | 7.98            | 610.82          | 67.01           | 103.63           | 8883.79  |
|                   | R  | 383.56          | 403.55          | 132.48          | 44.09           | 13957.83        | 8.93            | 682.95          | 77.69           | 134.66           | 15825.75 |
|                   | Fl | 354.66          | 1573.84         | 92.84           | 69.17           | 5910.35         | 7.27            | 467.28          | 75.39           | 183.47           | 8734.27  |
| 30                | B  | 201.29          | 1273.16         | 108.90          | 16.45           | 6863.17         | 5.96            | 406.65          | 63.89           | 37.74            | 8977.21  |
|                   | RB | 351.75          | 961.64          | 205.73          | 23.27           | 8081.53         | 7.06            | 524.31          | 77.46           | 47.11            | 10279.86 |
|                   | R  | 195.57          | 687.26          | 10.63           | 39.24           | 7577.39         | 10.43           | 477.60          | 64.09           | 60.77            | 9222.98  |
|                   | Fl | 193.91          | 975.65          | 107.13          | 14.86           | 4671.94         | 6.39            | 491.71          | 72.47           | 35.76            | 6569.82  |
| 40                | B  | 342.38          | 2331.41         | 87.98           | 19.2            | 5321.96         | 4.85            | 151.44          | 73.94           | 41.12            | 8374.39  |
|                   | RB | 532.51          | 1775.08         | 121.72          | 23.75           | 6484.09         | 6.86            | 289.84          | 64.23           | 41.88            | 9339.96  |
|                   | R  | 169.99          | 1008.90         | 457.80          | 13.35           | 2039.72         | 6.44            | 112.53          | 63.59           | 35.41            | 3907.71  |
|                   | Fl | 447.09          | 1076.39         | 89.53           | 26.72           | 2117.72         | 6.11            | 512.76          | 77.57           | 49.50            | 4403.38  |
| Mean:             |    | 351.25          | 1367.48         | 261.83          | 77.16           | 7998.78         | 7.64            | 416.80          | 68.93           | 114.53           | 9866.73  |

#### STRESS-RELATED PHYTOHORMONES

|                   |    | BeA<br>(benzoic acid) | SA        | 12-oxo-PDA | JA       | JA-Met | ABA    | ABA-GLU | $\Sigma$  |
|-------------------|----|-----------------------|-----------|------------|----------|--------|--------|---------|-----------|
| Starting material |    | 180809.46             | 164168.68 | 11430.20   | 3118.68  | 34.13  | 575.67 | 709.33  | 360846.12 |
| 10                | B  | 89419.60              | 22201.59  | 4753.29    | 2442.93  | 37.26  | 242.52 | 264.80  | 119361.99 |
|                   | RB | 54875.13              | 21555.01  | 4296.79    | 2550.14  | 31.59  | 306.89 | 177.12  | 83792.67  |
|                   | R  | 47984.71              | 23990.43  | 9655.75    | 1381.81  | 39.31  | 104.23 | 270.18  | 77426.43  |
|                   | Fl | 133375.77             | 23389.63  | 5114.17    | 2315.04  | 35.87  | 287.90 | 328.33  | 164846.72 |
| 20                | B  | 168154.43             | 65449.35  | 6941.15    | 6547.09  | 35.20  | 219.05 | 280.78  | 247627.06 |
|                   | RB | 98761.93              | 31317.20  | 4952.23    | 3047.40  | 35.85  | 232.12 | 264.24  | 138610.97 |
|                   | R  | 41612.05              | 48349.69  | 4996.96    | 2882.71  | 37.39  | 166.88 | 244.38  | 98290.07  |
|                   | Fl | 58524.75              | 48408.66  | 8580.79    | 3419.09  | 34.82  | 189.08 | 330.25  | 119487.44 |
| 30                | B  | 149975.06             | 45047.27  | 8537.23    | 2819.50  | 34.92  | 194.17 | 520.15  | 207128.29 |
|                   | RB | 127428.48             | 59483.98  | 10315.74   | 2429.51  | 42.30  | 215.17 | 544.76  | 200459.94 |
|                   | R  | 106946.51             | 41061.65  | 5390.54    | 1281.32  | 36.19  | 185.71 | 326.19  | 15228.10  |
|                   | Fl | 149184.30             | 55962.46  | 10836.74   | 10119.09 | 33.79  | 210.19 | 654.35  | 227000.91 |
| 40                | B  | 154511.27             | 23235.28  | 16189.64   | 3229.90  | 37.95  | 286.31 | 526.26  | 198016.60 |
|                   | RB | 119965.04             | 17720.18  | 15056.34   | 1702.13  | 37.64  | 200.58 | 726.69  | 155408.60 |
|                   | R  | 111105.89             | 32909.87  | 13802.33   | 1773.26  | 33.44  | 198.82 | 664.97  | 160488.57 |
|                   | Fl | 140235.15             | 72489.29  | 11056.35   | 2133.82  | 38.10  | 251.11 | 441.96  | 226645.79 |
| Mean:             |    | 104883.24             | 45104.74  | 9922.70    | 5700.20  | 36.95  | 205.56 | 451.90  | 162526.74 |

<sup>1</sup>B—100% blue LED (430 nm); RB—combination of red (70%) and blue (30%) LED; R—100% red LED (670 nm); Fl—control. fluorescence Philips TK-D 36W/54 lamps.

**Table S2.** The optimized mass spectrometry parameters for phytohormone quantitation. The following conditions were optimal for the analysis: capillary voltage 4 kV, gas temperature 350 °C, gas flow 12 l/min, and nebulizer pressure of 35 psi. The measurements were conducted by multiple reaction monitoring (MRM) in positive polarity. MassHunter software was used to control the LC-MS/MS system and data analysis. For MRM parameters, MassHunter Optimizer was used. In case of internal standards (ISTD) in parenthesis are given their quantities..

| Compound   |                    | Type of ion                         | Quantifier transition<br>(precursor/product ions) | Fragmentor voltage<br>(V) | Collision<br>energy (V) | MRM Start Time<br>(min.) |
|------------|--------------------|-------------------------------------|---------------------------------------------------|---------------------------|-------------------------|--------------------------|
| t-Z7G      |                    | [M+H] <sup>+</sup>                  | 382.1/220.1                                       | 122                       | 17                      | 1                        |
| t-Z        |                    | [M+H] <sup>+</sup>                  | 220.2/136.3                                       | 85                        | 9                       |                          |
| t-ZOG      |                    | [M+H] <sup>+</sup>                  | 382.1/202.1                                       | 142                       | 17                      |                          |
| DHZ-N15    | ISTD<br>(10 pmol)  | [M+H] <sup>+</sup>                  | 226.2/152                                         | 124                       | 18                      |                          |
| DH-Z       |                    | [M+H] <sup>+</sup>                  | 222.2/136                                         | 124                       | 18                      |                          |
| c-Z        |                    | [M+H] <sup>+</sup>                  | 220.2/136.3                                       | 85                        | 9                       |                          |
| K-N15      | ISTD<br>(10 pmol)  | [M+H] <sup>+</sup>                  | 220.1/192.3                                       | 90                        | 9                       | 4.7                      |
| K          |                    | [M+H] <sup>+</sup>                  | 216.1/188.3                                       | 90                        | 9                       |                          |
| GA8-D2     | ISTD<br>(10 pmol)  | [M-H <sub>2</sub> O+H] <sup>+</sup> | 321.2/303.1                                       | 150                       | 5                       |                          |
| GA8        |                    | [M-H <sub>2</sub> O+H] <sup>+</sup> | 319.3/257.2                                       | 102                       | 9                       |                          |
| oxo-IAA    |                    | [M+H] <sup>+</sup>                  | 192.2/146.1                                       | 54                        | 9                       |                          |
| t-Z-R-D5   | ISTD<br>(10 pmol)  | [M+H] <sup>+</sup>                  | 357.3/225.2                                       | 116                       | 17                      | 5.9                      |
| t-Z-R      |                    | [M+H] <sup>+</sup>                  | 352.2/220.3                                       | 120                       | 9                       |                          |
| DH-Z-R     |                    | [M+H] <sup>+</sup>                  | 354.2/222.1                                       | 124                       | 14                      |                          |
| c-Z-R      |                    | [M+H] <sup>+</sup>                  | 352.2/220.3                                       | 120                       | 9                       |                          |
| IP         |                    | [M+H] <sup>+</sup>                  | 204.1/148.3                                       | 90                        | 9                       | 7.3                      |
| IAA-ASA    |                    | [M+H] <sup>+</sup>                  | 291.2/130.1                                       | 54                        | 25                      |                          |
| BeA-D4     | ISTD<br>(500 pmol) | [M+H] <sup>+</sup>                  | 128.1/84.1                                        | 61                        | 13                      |                          |
| BeA        |                    | [M+H] <sup>+</sup>                  | 123.1/79.1                                        | 56                        | 13                      |                          |
| KR         |                    | [M+H] <sup>+</sup>                  | 204.1/148.3                                       | 90                        | 9                       | 9.1                      |
| IAA-Glu    |                    | [M+H] <sup>+</sup>                  | 305.2/130.1                                       | 58                        | 29                      |                          |
| GA3-D2     | ISTD<br>(10 pmol)  | [M-H <sub>2</sub> O+H] <sup>+</sup> | 331.2/314.1                                       | 100                       | 14                      | 11                       |
| GA3        |                    | [M-H <sub>2</sub> O+H] <sup>+</sup> | 329.3/311.3                                       | 100                       | 14                      |                          |
| GA1-D2     | ISTD<br>(10 pmol)  | [M-H <sub>2</sub> O+H] <sup>+</sup> | 333.3/287.2                                       | 58                        | 9                       |                          |
| GA1        |                    | [M-H <sub>2</sub> O+H] <sup>+</sup> | 331.3/285.3                                       | 100                       | 14                      |                          |
| IAA-Carb   |                    | [M+H] <sup>+</sup>                  | 162.2/118.1                                       | 58                        | 9                       |                          |
| IAA-D5     | ISTD<br>(100 pmol) | [M+H] <sup>+</sup>                  | 181.1/135.1                                       | 38                        | 14                      |                          |
| IAA        |                    | [M+H] <sup>+</sup>                  | 176.1/130.3                                       | 51                        | 9                       |                          |
| SA-D4      | ISTD<br>(500 pmol) | [M+H] <sup>+</sup>                  | 143.2/125.2                                       | 80                        | 14                      | 11.3                     |
| SA         |                    | [M+H] <sup>+</sup>                  | 139.2/121.2                                       | 80                        | 14                      |                          |
| ABA-GLU    |                    | [M-H <sub>2</sub> O+H] <sup>+</sup> | 409.2/247.1                                       | 104                       | 14                      | 12.0                     |
| GA6-D2     | ISTD<br>(10 pmol)  | [M-H <sub>2</sub> O+H] <sup>+</sup> | 331.3/115.1                                       | 96                        | 5                       | 13.2                     |
| GA6        |                    | [M-H <sub>2</sub> O+H] <sup>+</sup> | 329.3/283.3                                       | 104                       | 14                      |                          |
| IPD        |                    | [M+H] <sup>+</sup>                  | 336.2/204.1                                       | 124                       | 14                      |                          |
| ABA-D6     | ISTD<br>(30 pmol)  | [M-H <sub>2</sub> O+H] <sup>+</sup> | 253.4/191.3                                       | 80                        | 14                      | 17.5                     |
| ABA        |                    | [M-H <sub>2</sub> O+H] <sup>+</sup> | 247.4/187.2                                       | 80                        | 14                      |                          |
| GA5-D2     | ISTD<br>(10 pmol)  | [M-H <sub>2</sub> O+H] <sup>+</sup> | 287.3/115.0                                       | 96                        | 5                       | 18.0                     |
| GA5        |                    | [M-H <sub>2</sub> O+H] <sup>+</sup> | 285.1/115.0                                       | 96                        | 5                       |                          |
| GA20       |                    | [M-H <sub>2</sub> O+H] <sup>+</sup> | 287.3/115.0                                       | 96                        | 5                       |                          |
| IAA-Met-D5 | ISTD<br>(100 pmol) | [M+H] <sup>+</sup>                  | 195/134                                           | 54                        | 9                       | 18.8                     |
| IAA-Met    |                    | [M+H] <sup>+</sup>                  | 190/130                                           | 54                        | 9                       |                          |
| JA-D5      | ISTD               | [M+H] <sup>+</sup>                  | 216.3/153.2                                       | 80                        | 5                       | 19.5                     |

| Compound                 |                   | Type of ion                         | Quantifier transition<br>(precursor/product ions) | Fragmentor voltage<br>(V) | Collision<br>energy (V) | MRM Start Time<br>(min.) |
|--------------------------|-------------------|-------------------------------------|---------------------------------------------------|---------------------------|-------------------------|--------------------------|
| JA                       | (100 pmol)        | [M+H] <sup>+</sup>                  | 211.3/151.2                                       | 80                        | 14                      |                          |
| GA7                      |                   | [M-H <sub>2</sub> O+H] <sup>+</sup> | 313.2/223.1                                       | 104                       | 14                      | 20.9                     |
| GA4-D2                   | ISTD<br>(10 pmol) | [M-H <sub>2</sub> O+H] <sup>+</sup> | 317.3/271.2                                       | 88                        | 9                       |                          |
| GA4                      |                   | [M-H <sub>2</sub> O+H] <sup>+</sup> | 315.3/269.3                                       | 100                       | 14                      |                          |
| JA-Met                   |                   | [M+H] <sup>+</sup>                  | 225.3/151.2                                       | 58                        | 5                       | 22.51                    |
| GA9                      |                   | [M-H <sub>2</sub> O+H] <sup>+</sup> | 271.3/225.2                                       | 136                       | 13                      | 23.1                     |
| dinor-12-oxo-<br>OPDA-D5 | ISTD<br>(10 pmol) | [M+H] <sup>+</sup>                  | 270.3/252.2                                       | 84                        | 5                       | 23.72                    |
| 12-oxo-PDA               |                   | [M+H] <sup>+</sup>                  | 293.3/275.2                                       | 68                        | 9                       | 25.54                    |

**Table S3.** Validation parameters of phytohormone estimation method.

| Compound | Calibration curve<br>$y = ax + b$ |         | R <sup>2</sup> | calibration<br>levels | linearity range (ng/ml) | LOD<br>(ng/ml) | LOQ<br>(ng/ml) | M (mol/g) | LOD<br>(pmol/ml) | LOQ<br>(pmol/ml) | Recovery†<br>(%) | Matrix†<br>effect (%) |
|----------|-----------------------------------|---------|----------------|-----------------------|-------------------------|----------------|----------------|-----------|------------------|------------------|------------------|-----------------------|
|          | a                                 | b       |                |                       |                         |                |                |           |                  |                  |                  |                       |
| t-Z7G    | 188.58                            | -142.26 | 0.9994         | 6                     | 1.7 to 76.7             | 0.05           | 0.15           | 381.4     | 0.13             | 0.39             | 99 (2)*          | 83 (9)                |
| t-Z      | 58.01                             | -61.13  | 0.9997         | 6                     | 2.8 to 141.5            | 0.79           | 2.40           | 219.3     | 3.60             | 10.95            | 109 (5)          | 90 (17)               |
| t-ZOG    | 154.29                            | -299.09 | 0.9971         | 6                     | 1.8 to 84.4             | 0.05           | 0.15           | 381.4     | 0.13             | 0.39             | 100 (2)          | 83 (10)               |
| DH-Z     | 67.28                             | -133.55 | 0.9980         | 6                     | 4.7 to 219.4            | 0.79           | 2.40           | 221.3     | 3.57             | 10.85            | 101 (2)          | 83 (9)                |
| c-Z      | 114.85                            | -25.84  | 0.9999         | 6                     | 2.9 to 132.5            | 0.22           | 0.67           | 219.3     | 1.00             | 3.06             | 101 (2)          | 83 (9)                |
| KIN      | 25.53                             | -5.03   | 0.9997         | 6                     | 9.4 to 434.5            | 2.25           | 6.83           | 215.2     | 10.45            | 31.73            | 97 (3)           | 88 (6)                |
| oxo-IAA  | 57.44                             | -119.60 | 0.9995         | 6                     | 9.1 to 421.9            | 0.71           | 2.14           | 191.2     | 3.71             | 11.19            | 84 (2)           | 75 (7)                |
| GA8      | 1.13                              | -5.41   | 0.9999         | 6                     | 27.4 to 1265.8          | 3.81           | 11.53          | 364.4     | 10.46            | 31.64            | 92 (20)          | 75 (11)               |
| t-Z-R    | 56.33                             | -6.22   | 0.9992         | 6                     | 3.2 to 149.4            | 0.28           | 0.86           | 351.4     | 0.80             | 2.45             | 103 (3)          | 76 (8)                |
| DH-Z-R   | 132.17                            | -27.25  | 0.9999         | 6                     | 1.4 to 65.8             | 0.14           | 0.44           | 353.4     | 0.40             | 1.25             | 102 (3)          | 78 (8)                |
| c-Z-R    | 205.97                            | -56.38  | 0.9991         | 6                     | 1.3 to 60.2             | 0.51           | 1.56           | 351.4     | 1.45             | 4.44             | 108 (2)          | 79 (5)                |
| IAA-ASA  | 3.29                              | -18.68  | 0.9994         | 6                     | 9.3 to 431.5            | 3.00           | 9.10           | 290.3     | 10.33            | 31.35            | 88 (2)           | 79 (7)                |
| IP       | 309.68                            | -730.26 | 0.9991         | 6                     | 9.8 to 451.2            | 0.17           | 0.53           | 203.3     | 0.84             | 2.61             | 102 (3)          | 82 (8)                |
| BeA      | 2.39                              | 5.88    | 0.9999         | 6                     | 27.6 to 1278.2          | 15.16          | 45.95          | 122.1     | 124.14           | 376.27           | 77 (5)           | 43 (10)               |
| IAA-GLUT | 10.45                             | -131.79 | 0.9954         | 6                     | 9.2 to 425.1            | 2.60           | 7.88           | 304.3     | 8.54             | 25.89            | 89 (2)           | 78 (7)                |
| KR       | 27.52                             | 2.59    | 0.9998         | 6                     | 4.6 to 210.9            | 0.82           | 2.48           | 347.3     | 2.36             | 7.14             | 103 (3)          | 79 (8)                |
| SA       | 5.61                              | -24.43  | 0.9996         | 6                     | 11.6 to 538.5           | 4.31           | 13.07          | 138.1     | 31.20            | 94.63            | 79 (5)           | 45 (9)                |
| IAA-Carb | 3.15                              | 4.91    | 1.0000         | 6                     | 29.6 to 1369.6          | 12.28          | 37.20          | 161.2     | 76.20            | 230.83           | 76 (2)           | 45 (8)                |
| IAA      | 27.95                             | -24.85  | 0.9998         | 6                     | 6.4 to 296.9            | 2.63           | 7.98           | 203.2     | 12.94            | 39.26            | 74 (2)           | 49 (7)                |
| GA3      | 0.78                              | 2.21    | 1.0000         | 6                     | 29.2 to 1351.0          | 14.93          | 45.25          | 346.4     | 43.10            | 130.64           | 94 (20)          | 61 (20)               |
| GA1      | 4.31                              | -4.64   | 1.0000         | 6                     | 27.4 to 1265.8          | 5.20           | 15.75          | 348.4     | 14.93            | 45.21            | 91 (1)           | 106 (14)              |
| ABA-GLU  | 32.35                             | 212.28  | 0.9996         | 6                     | 18.2 to 843.9           | 0.32           | 0.96           | 426.5     | 0.75             | 2.25             | 103 (4)          | 85 (10)               |
| GA6      | 0.41                              | -9.01   | 0.9982         | 6                     | 54.7 to 2531.6          | 12.01          | 36.40          | 346.4     | 34.67            | 105.09           | 98 (15)          | 88 (18)               |
| IPAD     | 860.86                            | -969.53 | 0.9990         | 6                     | 3.6 to 168.1            | 0.08           | 0.24           | 335.4     | 0.24             | 0.72             | 109 (5)          | 94 (17)               |
| ABA      | 9.95                              | -17.16  | 0.9982         | 6                     | 9.2 to 427.7            | 1.78           | 5.38           | 264.3     | 6.73             | 20.35            | 105 (4)          | 87 (10)               |
| GA5      | 8.81                              | -5.62   | 0.9996         | 6                     | 9.1 to 421.9            | 0.90           | 2.74           | 330.4     | 2.72             | 8.29             | 100 (5)          | 106 (14)              |
| GA20     | 15.375                            | -48.458 | 0.9997         | 6                     | 35 to 702               | 2.28           | 6.9            | 332.4     | 6.86             | 20.76            | 104 (4)          | 106 (14)              |
| IAA-Met  | 8.99                              | -23.69  | 0.9983         | 6                     | 9.1 to 421.9            | 0.78           | 2.38           | 189.2     | 4.12             | 12.58            | 79 (2)           | 59 (7)                |
| JA       | 4.26                              | 17.48   | 0.9994         | 6                     | 18.2 to 843.9           | 1.74           | 5.27           | 210.3     | 8.27             | 25.06            | 97 (18)          | 87 (18)               |
| IBA      | 164.48                            | -312.42 | 0.9998         | 6                     | 12.8 to 592.8           | 0.96           | 2.91           | 203.2     | 4.72             | 14.32            | 85 (4)           | 63 (7)                |
| GA7      | 2.47                              | 10.10   | 0.9996         | 6                     | 18.2 to 843.9           | 3.07           | 9.30           | 330.4     | 9.29             | 28.15            | 99 (10)          | 87 (12)               |
| GA4      | 11.45                             | 16.84   | 0.9998         | 6                     | 9.1 to 421.9            | 1.59           | 4.81           | 332.4     | 4.78             | 14.47            | 99 (1)           | 82 (9)                |

| Compound   | Calibration curve<br>$y = ax + b$ |       | $R^2$  | calibration<br>levels | linearity range (ng/ml) | LOD<br>(ng/ml) | LOQ<br>(ng/ml) | M (mol/g) | LOD<br>(pmol/ml) | LOQ<br>(pmol/ml) | Recovery†<br>(%) | Matrix†<br>effect (%) |
|------------|-----------------------------------|-------|--------|-----------------------|-------------------------|----------------|----------------|-----------|------------------|------------------|------------------|-----------------------|
|            | a                                 | b     |        |                       |                         |                |                |           |                  |                  |                  |                       |
| JA-Met     | 9.71                              | 13.06 | 0.9999 | 6                     | 9.4 to 434.5            | 1.82           | 5.51           | 224.3     | 8.11             | 24.57            | 87 (9)           | 85 (12)               |
| GA9        | 2.68                              | 10.67 | 0.9999 | 6                     | 18.2 to 843.9           | 0.54           | 1.64           | 316.4     | 1.71             | 5.18             | 108 (9)          | 104 (9)               |
| 12-oxo-PDA | 7.03                              | 6.18  | 0.9999 | 6                     | 18.2 to 843.9           | 2.42           | 7.33           | 292.4     | 8.28             | 25.07            | 126 (17)         | 109 (17)              |

LOD – limit of detection  $3.3 \times S/a$ ; LOQ limit of quantitation  $10 \times S/a$ ; where S – standard deviation of peak area in calibration curve, a- sensitivity (slope of calibration curve).

† The recovery and recovery influenced by matrix effects (matrix effect) were examined by comparing the MS signals (peak areas) for three sets of samples: (a) phytohormones solutions in acetonitrile, (b) phytohormones in sample extracts, and (c) sample extracts spiked with phytohormones before extraction. For the recovery estimation, peak areas in the c and b sets were compared. For matrix effect, the peak areas for the b and a sample sets were used.

\* Values in parenthesis are standard deviation (n =3).
